# Supplementary material
Source: PubMed Central journal article supplement (PMC9836426)
Supplement: mmc1.pdf [file mmc1.pdf]

# THE LANCET

## Microbe

### **Supplementary appendix**

This appendix formed part of the original submission and has been peer reviewed.  
We post it as supplied by the authors.

Supplement to: Towns JM, Lim CK, Chow, EPF, et al. Title. *Lancet Microbe* 2023;  
published online Jan 12. [https://doi.org/10.1016/S2666-5247\(22\)00382-2](https://doi.org/10.1016/S2666-5247(22)00382-2).

## **SUPPLEMENTARY APPENDIX**

### **Persistence of monkeypox virus at oral and rectal sites.**

Towns, Lim *et al*

#### TABLE OF CONTENTS

|                          | Page |
|--------------------------|------|
| Supplementary Methods    | 2    |
| Supplementary Table 1    | 3    |
| Supplementary Figure 1   | 4    |
| Supplementary References | 6    |
| Acknowledgements         | 7    |

#### **SUPPLEMENTARY METHODS**

### ***Case Clearance***

In Victoria, Australia, the Department of Health stipulated that a person with mpox (previously monkeypox disease) could leave isolation when all the following criteria were met: a) they are clinically well and all systemic symptoms have resolved; b) there have been no new lesions for at least 48 hours, there are no mucous membrane lesions and all lesions in exposed areas have re-epithelialised; and c) lesions on unexposed skin, if not fully healed, must be covered at all times when in contact with other people.<sup>1,2</sup> *Re-epithelialised* was defined as the formation of new skin once the crusts/scabs had fallen off lesions. The decision to clear a patient from isolation was made by the patient's treating clinician, who notified the Department of Health. The Victoria guidelines were aligned with the UK NHS virtual management of confirmed mpox cases, which stated that after self-isolation has ended, any remaining lesions should be covered when leaving the house or having close contact with people, until they are re-epithelialised.<sup>3</sup>

### ***Clinical samples and storage***

This study was conducted at Melbourne Sexual Health Centre, the main sexually transmitted infections clinic in Melbourne, Australia. Patients attending the clinic with symptoms suggestive of, or as a contact of mpox, had samples collected. This included clinician-collected lesion swabs and self-collected first-pass urine, oral and anal swabs on the day of first presentation (day 0) and then weekly until lesion resolution and clinical clearance was achieved. The first and second review visits occurred on a median of 7 days and on a median of 14 days after the first presentation. Oral and anal swabs were placed in viral transport medium and sent with the urine samples to the Victorian Infectious Diseases Reference Laboratory (VIDRL) at the Peter Doherty Institute for Infection and Immunity. The samples were stored at 4° Celsius for up to 24 hours prior to testing.

### ***Monkeypox virus PCR, culture, and serology***

Monkeypox virus polymerase chain reaction (PCR) testing has been previously described.<sup>4</sup> Monkeypox PCR-positive specimens were cultured in a 24-well cell-culture plate containing a Vero cell monolayer in an incubator at 37°C with 5% CO<sub>2</sub>. Wells were monitored for virus-induced cytopathic effect (CPE) and CPE readings were recorded by two independent readers for each sample. Serological testing for anti-Monkeypox IgG was conducted using indirect immunofluorescent assay (IFA) developed at VIDRL. Patient sera were incubated with microscope slides fixed with both Monkeypox-infected and non-infected Vero cells, followed by incubation with anti-human fluorescein-conjugated secondary antibody and visualisation by two independent readers.

### ***Statistical analysis***

All data analysis, including frequency analyses and calculation of proportions was performed using SPSS version 29.0.0.0.

## SUPPLEMENTARY TABLE 1

**S Table 1: Clinical and laboratory characteristics of 19 men with mpox.**

| <i>Characteristics of men</i>                                                         | n/N (%) | %    |
|---------------------------------------------------------------------------------------|---------|------|
| Median age: 36 years (IQR 30 – 40 years)                                              |         |      |
| People living with HIV                                                                | 3/19    | 15.8 |
| Taking HIV PrEP                                                                       | 10/16   | 62.5 |
| Previous smallpox vaccination                                                         | 2/19    | 10.5 |
| Proctitis                                                                             | 11/19   | 57.9 |
| Pharyngitis                                                                           | 2/19    | 10.5 |
| Prodrome                                                                              | 11/19   | 57.9 |
| Hospitalised                                                                          | 1/19    | 5.3  |
| Lesion sites:                                                                         |         |      |
| Oral                                                                                  | 1/19    | 5.3  |
| Anal                                                                                  | 9/19    | 47.4 |
| Genital                                                                               | 9/19    | 47.4 |
| Other                                                                                 | 6/19    | 31.6 |
| <i>Monkeypox virus PCR</i>                                                            |         |      |
| Mucocutaneous lesion swab                                                             | 18/19   | 94.7 |
| Oral swab PCR positive                                                                | 14/19   | 73.7 |
| Oral/facial lesion present at PCR positive site                                       | 2/14    | 14.3 |
| Anal swab PCR positive                                                                | 16/19   | 84.2 |
| Anal lesion present at PCR positive site                                              | 9/16    | 56.3 |
| Urine PCR positive                                                                    | 4/19    | 21.1 |
| Genital lesion present if urine PCR positive                                          | 3/4     | 75.0 |
| No. of patients with any positive PCR at clinical clearance                           | 10/19   | 52.6 |
| Oral PCR positive                                                                     | 6/19    | 31.6 |
| Anal PCR positive                                                                     | 9/19    | 47.4 |
| Urine PCR positive                                                                    | 2/19    | 10.5 |
| <i>Monkeypox virus culture</i>                                                        |         |      |
| No. of patients with any positive culture at clinical clearance                       | 8/19    | 42.1 |
| Oral culture positive                                                                 | 6/6     | 100  |
| Anal culture positive                                                                 | 6/9     | 66.6 |
| Urine culture positive                                                                | 0/2     | 0    |
| <i>Monkeypox virus serology</i>                                                       |         |      |
| Anti-monkeypox IgG seropositivity*                                                    | 8/16    | 50.0 |
| *Serology specimens collected at day 0 (n = 10), day 4 (n = 1) and days 13-15 (n = 5) |         |      |

## SUPPLEMENTARY FIGURE 1





## SUPPLEMENTARY REFERENCES

1. Victorian Department of Health. *Information for Clinicians Managing Cases of Monkeypox*. Version 4 – 16 September 2022. [https://www.health.vic.gov.au/sites/default/files/2022-08/information-for-clinicians-managing-cases-of-monkeypox\\_0.docx](https://www.health.vic.gov.au/sites/default/files/2022-08/information-for-clinicians-managing-cases-of-monkeypox_0.docx).
2. Australian Government Department of Health and Aged Care. *Monkeypox Virus Infection CDNA National Guidelines for Public Health Units*. Version 3.0 Date 09/12/2022. [https://www.health.gov.au/sites/default/files/2022-12/monkeypox-virus-infection-cdna-national-guidelines-for-public-health-units\\_0.pdf](https://www.health.gov.au/sites/default/files/2022-12/monkeypox-virus-infection-cdna-national-guidelines-for-public-health-units_0.pdf).
3. United Kingdom National Health Service. *Virtual Management of Confirmed Monkeypox Cases*. Version 1, 21 June 2022. <https://www.england.nhs.uk/wp-content/uploads/2022/06/B1692-virtual-management-of-confirmed-monkeypox-cases.pdf>.
4. Hammerschlag Y, MacLeod G, Papadakis G, Adan Sanchez A, Druce J, Tairaoa G, Savic I, Mumford J, Roberts J, Caly L, Friedman D, Williamson DA, Cheng AC, McMahon JH. *Monkeypox infection presenting as genital rash, Australia, May 2022*. *Euro Surveill*. 2022 Jun;27(22):2200411. doi: 10.2807/1560-7917.ES.2022.27.22.2200411. PMID: 35656835; PMCID: PMC9164678.

## **ACKNOWLEDGEMENTS**

We declare no competing interests. JMT and MYC are supported by Australian National Health and Medical Research Council (NHMRC) Partner Project Grant APP2003399. DAW, EPFC, and CKF are supported by Investigator Grants from the NHMRC (GNT1174555, GNT1172873 and GNT1172900 respectively). This work was approved by the Alfred Hospital Human Research Ethics Committee. JMT and MYC conceived the study. All authors helped to design the study and interpret results. DL assisted with the preparation of study materials. JMT, CKL and MYC drafted the manuscript, and all authors reviewed the manuscript and contributed to the final version.

We acknowledge the clinical staff from Melbourne Sexual Health Centre, involved with caring for patients.
